# Supplementary material
Source: ML conference proceedings conference paper supplement (https://openaccess.thecvf.com/content/CVPR2022/html/Chang_DATA_Domain-Aware_and_CVPR_2022_paper.html)
Supplement: Supplementary file 2 [file Chang_DATA_Domain-Aware_and_CVPR_2022_supplemental.zip]

Archive with 1 entries (1 files):
- 01408-supp.pdf
